# Supplementary material for: Redox regulation by reversible protein S-thiolation in Gram-positive bacteria
Source: PubMed Central journal article supplement — Redox Biol. 2018 Aug 24;20:130–45. doi: 10.1016/j.redox.2018.08.017 (PMC6178380; doi:10.1016/j.redox.2018.08.017), 2018-08-24
Supplement: mmc1.pdf [file mmc1.pdf]

**Table S1: Summary of the S-mycothiolated proteins in *Corynebacterium glutamicum*, *Corynebacterium diphtheriae* and *Mycobacterium smegmatis***

| Accession                                             | Protein            | Function                                                 | Conservation/function of Cys-SSM                    | Peptide-SSM Sequence                                     |
|-------------------------------------------------------|--------------------|----------------------------------------------------------|-----------------------------------------------------|----------------------------------------------------------|
| <b><i>Corynebacterium glutamicum</i><sup>1</sup></b>  |                    |                                                          |                                                     |                                                          |
| <b>Metabolism of carbohydrates and amino acids</b>    |                    |                                                          |                                                     |                                                          |
| Q6M5P4                                                | MalP               | Maltodextrin phosphorylase                               | Cys180 not cons.                                    | (R)ASNLVVC <sub>180</sub> (+484)FDDm(+16)K(T)            |
| Q8NRB3                                                | MetE               | Methionine synthase                                      | <b>Cys713 Zn-binding active site</b>                | (R)QLWVNPDC <sub>713</sub> (+484)GLK(T)                  |
| P08499                                                | Hom                | Homoserine dehydrogenase                                 | Cys239 not cons.                                    | (R)YVADDVY <sub>239</sub> (+484)EGISNISAAIEAAQAGHTIK(L)  |
| Q8NLE6                                                | Ino-1              | Myo-inositol-1-phosphate synthase                        | Cys79 not cons.                                     | (K)VGIDLDATASQNC <sub>79</sub> (+484)TIK(I)              |
| P19537                                                | Fba                | Fructose-bisphosphate aldolase                           | Cys332 not cons.                                    | (R)IESC <sub>332</sub> (+484)QDUK(S)                     |
| P77844                                                | Pta                | Phosphate acetyltransferase                              | Cys367 not cons.                                    | (R)RLNPELC <sub>367</sub> (+484)VDGFLQFDAAVDPGVAR(K)     |
| Q6M8P0                                                | XylB               | Sugar (pentulose and hexulose) kinase                    | Cys338 not cons.                                    | (R)GVLGALNC <sub>338</sub> (+484)ATTR(E)                 |
| <b>Metabolism of coenzymes and nucleotides</b>        |                    |                                                          |                                                     |                                                          |
| Q8NM99                                                | GuaB1              | Inosine-5'-monophosphate dehydrogenase                   | <b>Cys302 active site, Thioimidate intermediate</b> | (K)JGVGPGAmC <sub>302</sub> (+484)TTR(M)                 |
| Q8NSR5                                                | GuaB2              | Inosine-5'-monophosphate dehydrogenase                   | <b>Cys317 active site, Thioimidate intermediate</b> | (K)JGVGPGSIC <sub>317</sub> (+484)TTR(V)                 |
| Q8NM15                                                | PurL               | Phosphoribosylformylglycinamide synthase 2               | Cys716 not cons.                                    | (K)JLGC <sub>716</sub> (+484)TNSAVIAVK(G)                |
| Q8NQH1                                                | TheD(ThiD1)        | Thiamine biosynthesis multifunctional protein            | <b>Cys451 HMP substrate binding</b>                 | (R)WNTTNSHGTC <sub>451</sub> (+484)SLSASLAKT(I)          |
| Q8NQ6                                                 | PheT               | Phenylalanyl-tRNA synthetase beta subunit                | <b>Cys89 in tRNA binding domain</b>                 | (R)HC <sub>89</sub> (+484)HVNVDGANGTEGLQSVGAR(N)         |
| Q8NRI1                                                | NadC               | Nicotinate-nucleotide pyrophosphorylase                  | Cys114 not cons.                                    | (R)TSGIATLTC <sub>114</sub> (+484)YVAEVK(G)              |
| <b>Protein biosynthesis and quality control</b>       |                    |                                                          |                                                     |                                                          |
| Q8NT01                                                | RpsC               | 30S ribosomal protein S3                                 | <b>Cys153 cons.</b>                                 | (K)VV <sub>153</sub> (+484)SGLR(L)                       |
| Q8NSV6                                                | RplM               | 50S ribosomal protein L13                                | Cys50 not cons.                                     | (K)GKPLYAPNVC <sub>50</sub> (+484)GDHVVIVINADK(V)        |
| Q8NSV6                                                | RpsM               | 30S ribosomal protein S13                                | Cys86 not cons.                                     | (R)KIEIG <sub>86</sub> (+484)YQGR(H)                     |
| Q8NLF9                                                | RpsF               | 30S ribosomal protein S6                                 | <b>Cys67 cons.</b>                                  | (K)C <sub>67</sub> (+484)ESATVLELR(V)                    |
| P42439                                                | Tuf                | Elongation factor Tu                                     | <b>Cys277 cons.</b>                                 | (K)LLDSEAGDNC <sub>277</sub> (+484)GLLR(G)               |
| <b>Enzymes involved in detoxification</b>             |                    |                                                          |                                                     |                                                          |
| Q8NRG3                                                | Tpx                | Thiol peroxidase                                         | <b>Cys60 peroxidatic</b>                            | (K)LVNIFPSVDTGVC <sub>60</sub> (+484)ATSVR(K)            |
| Q8NM12                                                | Mpx                | Mycothiol peroxidase                                     | <b>Cys94 resolving</b>                              | (R)FC <sub>94</sub> (+484)SAEIGNVPSAFR(S)                |
| Q8NNH5                                                | HmuO               | Heme oxygenase                                           | <b>Cys36 peroxidatic</b>                            | (K)C <sub>36</sub> (+484)GLTPQYGLQK(L)                   |
| Q8NLL5                                                | MsrA               | Peptide methionine sulfoxide reductase                   | <b>Cys91 cons.</b>                                  | (R)EYVSEELSFVC <sub>91</sub> (+484)FEDLQK(L)             |
| <b>Proteins with other/unknown functions</b>          |                    |                                                          |                                                     |                                                          |
| IDLKH6                                                | WAS_1783           | Uncharacterized protein (WAS_1783)                       | Cys222 not cons.                                    | (R)QVFC <sub>222</sub> (+484)LSSSGR(E)                   |
| <b><i>Corynebacterium diphtheriae</i><sup>2</sup></b> |                    |                                                          |                                                     |                                                          |
| <b>Metabolism of carbohydrates and amino acids</b>    |                    |                                                          |                                                     |                                                          |
| Q6NH1                                                 | Ndh (DIP1217)      | NADH dehydrogenase                                       | Cys159 not cons.                                    | (R)AEmC <sub>159</sub> (+484)EDPKER(E)                   |
| Q6NG08                                                | DIP1726            | 4-alpha-glucanotransferase                               | Cys45 not cons.                                     | (R)SLGV <sub>45</sub> (+484)FGNEDEPATDHEPLTGMPSPEDQIR(Y) |
| Q6NH35                                                | Gap (DIP1310)      | Glyceraldehyde 3-phosphate dehydrogenase                 | <b>Cys153 cons. ; NAD binding domain</b>            | (K)HNINASNC <sub>153</sub> (+484)TTNCLAPMAK(V)           |
| Q6NF50                                                | GlpD (DIP2237)     | Putative glycerol-3-phosphate dehydrogenase              | Cys10 not cons.                                     | (K)SHC <sub>10</sub> (+484)TFNPYYQVWQR(F)                |
| Q6NFU0                                                | DIP1796            | Putative ribose/galactose isomerase                      | Cys143 not cons.                                    | (R)RIDILC <sub>143</sub> (+484)EYER(T)                   |
| Q6NIW1                                                | RbsK (DIP0655)     | Ribokinase                                               | Cys171 not cons.                                    | (R)GTVVNLPVIDVDORDC <sub>171</sub> (+484)LLR(A)          |
| Q6NHU4                                                | ThrA (DIP1036)     | Homoserine dehydrogenase                                 | Cys243 not cons.                                    | (R)TYADVYC <sub>243</sub> (+484)JEGISK(I)                |
| Q6NA1                                                 | DIP0511            | 4-hydroxy-tetrahydrodipicolinate synthase                | Cys141 not cons.                                    | (R)AFAAATSLPVAVDIPVC <sub>141</sub> (+484)YHTK(L)        |
| Q6NGP4                                                | DapA (DIP1464)     | 4-hydroxy-tetrahydrodipicolinate synthase                | Cys161 not cons.                                    | (R)SVVPIAPDLC <sub>161</sub> (+484)JL(R)                 |
| Q6NI06                                                | DIP0974            | Putative aminotransferase                                | Cys130 not cons.                                    | (R)C <sub>130</sub> (+484)DAPHELNDIDLVFINSNPNTGR(V)      |
| Q6NG84                                                | GlnA1 (DIP1644)    | Glutamine synthetase                                     | Cys220 not cons.                                    | (R)QHP <sub>220</sub> (+484)GTGSQQEINRY(F)               |
| Q6NHM7                                                | LeuB (DIP1105)     | 3-isopropylmalate dehydrogenase                          | Cys130 not cons.                                    | (R)EGETGLYC <sub>130</sub> (+484)JGGNGTLR(E)             |
| <b>Metabolism of coenzymes and nucleotides</b>        |                    |                                                          |                                                     |                                                          |
| Q6NG96                                                | DIP1631            | Uncharacterized protein                                  | <b>Cys43 cons.</b>                                  | (R)JAVQPGGC <sub>43</sub> (+484)SGLR(Y)                  |
| Q6NJ33                                                | GuaB (DIP0580)     | Inosine-5'-monophosphate dehydrogenase                   | <b>Cys317 cons. ; active site</b>                   | (K)JGVGPGSIC <sub>317</sub> (+484)TTR(V)                 |
| Q6NF38                                                | PurA (DIP2063)     | Adenylosuccinate synthetase                              | Cys423 not cons.                                    | (R)DQITVC <sub>423</sub> (+484)HDVMEA(-)                 |
| <b>Protein biosynthesis and quality control</b>       |                    |                                                          |                                                     |                                                          |
| P04053                                                | RplC (DIP0473)     | 50S ribosomal protein L3                                 | Cys154 not cons.                                    | (R)VGGIGAC <sub>154</sub> (+484)ATPGR(V)                 |
| Q6NI66                                                | RpsM (DIP0546)     | 30S ribosomal protein S13                                | <b>Cys86 cons.</b>                                  | (K)IEIG <sub>86</sub> (+484)YQGR(H)                      |
| Q6NI81                                                | Pth (DIP0897)      | Peptidyl-tRNA hydrolase                                  | Cys49 not cons.                                     | (K)ASGAVIEVGGC <sub>49</sub> (+484)JR(V)                 |
| Q6NGV2                                                | DIP1398            | Uncharacterized RNA methyltransferase                    | <b>Cys376 cons. ; nucleophile</b>                   | (R)IAAQSGPQAAIHGC <sub>376</sub> (+484)DPATFAR(D)        |
| <b>Enzymes involved in detoxification</b>             |                    |                                                          |                                                     |                                                          |
| Q6NGT3                                                | DtrA (DIP1420)     | Iron repressible polypeptide                             | <b>Cys61 cons. ; active site</b>                    | (K)DFTFVC <sub>61</sub> (+484)PTEIAAFGK(L)               |
| <b>Proteins with other/unknown functions</b>          |                    |                                                          |                                                     |                                                          |
| Q6NI65                                                | DIP0913            | Uncharacterized protein                                  | Cys22 not cons.                                     | (K)ERPTAGPQLYVPTVC <sub>22</sub> (+484)EAVVSAIR(A)       |
| Q6NHV4                                                | DIP1026            | Conserved hypothetical ATP-binding protein               | Cys75 not cons.                                     | (R)C <sub>75</sub> (+484)LEADLQVPR(F)                    |
| Q6NHND0                                               | DIP1102            | Putative uncharacterized protein                         | Cys441 not cons.                                    | (R)LLSC <sub>441</sub> (+484)PESGLYK(G)                  |
| Q6NH90                                                | DIP1250            | M18 family aminopeptidase                                | <b>Cys401 cons.</b>                                 | (K)AGSSHQVFGVNSVPC <sub>401</sub> (+484)GSTGPITATRL(L)   |
| Q6NH59                                                | DIP1287            | UPF0210 protein DIP1287                                  | Cys324 not cons.                                    | (K)GGMMAC <sub>324</sub> (+484)SR(V)                     |
| Q6NG33                                                | GlmS (DIP1700)     | Glutamine-fructose-6-phosphate aminotransferase          | Cys74 not cons.                                     | (K)VQALEQELTSPMPQSC <sub>74</sub> (+484)LGHTR(W)         |
| <b><i>Mycobacterium smegmatis</i><sup>3</sup></b>     |                    |                                                          |                                                     |                                                          |
| <b>Metabolism of carbohydrates and amino acids</b>    |                    |                                                          |                                                     |                                                          |
| A0QYH2                                                | MSMEG_3657         | Putative fumarate reductase/succinate dehydrogenase      | Cys225 not cons.                                    | (K)HFGETGC <sub>225</sub> (+484)VK(A)                    |
| A0R729                                                | GlpK3 (MSMEG_6759) | Glycerol kinase                                          | Cys294 not cons.                                    | (K)NGLTTC <sub>294</sub> (+484)YR(L)                     |
| A0QWW4                                                | TpiA (MSMEG_3086)  | Triosephosphate isomerase                                | Cys389 not cons.                                    | (R)ATLESIC <sub>389</sub> (+484)YQSR(D)                  |
| A0QPG1                                                | MSMEG_0386         | NAD dependent epimerase/dehydratase family protein       | Cys194 not cons.                                    | (R)WDPVGPNGEHAVALPSC <sub>194</sub> (+484)ASR(T)         |
| A0Q569                                                | MSMEG_1371         | Phosphomannose isomerase-like protein                    | Cys116 not cons.                                    | (R)HLD <sub>116</sub> (+484)YVQK(T)                      |
| A0QXQ6                                                | AceA (MSMEG_0911)  | Isocitrate lyase                                         | Cys268 not cons.                                    | (K)NGLEPC <sub>268</sub> (+484)IAR(A)                    |
| A0R421                                                | ClaA (MSMEG_5676)  | Citrate (5i) synthase                                    | <b>Cys143 cons.</b>                                 | (R)TIDEC <sub>143</sub> (+484)PTVYAR(F)                  |
| A0R2B1                                                | Kgd (MSMEG_5049)   | Multifunctional 2-oxoglutarate metabolism enzyme         | <b>Cys695 cons.</b>                                 | (R)SSEY <sub>695</sub> (+484)TDVAK(M)                    |
| Q9XSM1                                                | LysA (MSMEG_4958)  | Diaminopimelate decarboxylase                            | Cys442 not cons.                                    | (R)HNL <sub>442</sub> (+484)RPAVVAVADGQAR(L)             |
| A0Q5R5                                                | MSMEG_1574         | Glutamate decarboxylase                                  | Cys344 not cons.                                    | (R)AGYQVMQC <sub>344</sub> (+484)LSQAR(W)                |
| A0QZX1                                                | HisG (MSMEG_4180)  | ATP phosphoribosyltransferase                            | Cys179 not cons.                                    | (R)TLGHLNVAFGDPLC <sub>179</sub> (+484)EVEALIER(D)       |
| A0QUX8                                                | hncC (MSMEG_2374)  | Ketol-acid reductoisomerase                              | <b>Cys150 cons.</b>                                 | (K)GVC <sub>150</sub> (+484)LIADIDPKQGGQALSYAAIGGAR(A)   |
| <b>Metabolism of coenzymes and nucleotides</b>        |                    |                                                          |                                                     |                                                          |
| A0QZ17                                                | CobN (MSMEG_3864)  | Cobaltochelatase, CobN subunit                           | Cys787 not cons.                                    | (R)LAGTEC <sub>787</sub> (+484)FDQVLR(A)                 |
| A0QXQ8                                                | UmaA (MSMEG_0913)  | Methoxy mycolic acid synthase 1                          | <b>Cys76 cons. ; S-AdoMet binding</b>               | (K)LDLPGMTLLDVG <sub>76</sub> (+484)GWGALLER(A)          |
| A0R7G6                                                | Ino1 (MSMEG_6904)  | Inositol-3-phosphate synthase                            | <b>Cys18 cons.</b>                                  | (R)VAIVGVGNCC <sub>18</sub> (+484)ASSLVGVQVQYR(N)        |
| A0R061                                                | YfhF (MSMEG_4272)  | HesB/YadR/YfhF family protein                            | <b>Cys47 cons.</b>                                  | (R)JAVQPGGC <sub>47</sub> (+484)AGLR(Y)                  |
| A0R1P5                                                | MSMEG_4827         | Aminoglycoside phosphotransferase                        | Cys44 not cons.                                     | (R)FLSGGTQNVIELC <sub>44</sub> (+484)R(G)                |
| A0QLO0                                                | ThiG (MSMEG_0793)  | Thiazole synthase                                        | <b>Cys75 cons.</b>                                  | (R)JGALPNTAGC <sub>75</sub> (+484)R(G)                   |
| A0QZL6                                                | MSMEG_2394         | Cys/Met metabolism pyridoxal-phosphate-dependent enzyme  | Cys212 not cons.                                    | (K)SLSGHSDLIAGVYAGC <sub>212</sub> (+484)QPELAER(I)      |
| A0Q564                                                | Mki (MSMEG_1366)   | ABC transporter, ATP-binding protein                     | Cys71 not cons.                                     | (R)SVIDGTDILQC <sub>71</sub> (+484)SAKE(I)               |
| POCHO0                                                | NrdE2 (MSMEG_2299) | Ribonucleoside-diphosphate reductase subunit alpha 2     | <b>Cys396 cons. ; active site</b>                   | (K)ITHSNLC <sub>396</sub> (+484)SEILQVSTPSEFNDDLSYAK(V)  |
| A0QSU3                                                | GuaB (MSMEG_1602)  | Inosine-5'-monophosphate dehydrogenase                   | <b>Cys325 cons. ; active site</b>                   | (K)JGVGPGSIC <sub>325</sub> (+484)TTR(V)                 |
| A0QY8                                                 | GuaB2 (MSMEG_3634) | IMP dehydrogenase family protein                         | <b>Cys302 cons. ; thioimidate</b>                   | (K)JGVGPGAmC <sub>302</sub> (+484)TTR(M)                 |
| A0R4I0                                                | PurC (MSMEG_5841)  | Phosphoribosylaminoimidazole-succinocarboxamide synthase | Cys125 not cons.                                    | (K)TGTVC <sub>125</sub> (+484)GIALPPLGEGASKDFEPLTPATK(A) |
| A0QVQ5                                                | Pnp (MSMEG_2656)   | Polyribonucleotide nucleotidyltransferase                | Cys248 not cons.                                    | (K)ALC <sub>248</sub> (+484)AAQQLADR(A)                  |

| Protein biosynthesis and quality control     |                    |                                                            |                                      |  |                                                          |
|----------------------------------------------|--------------------|------------------------------------------------------------|--------------------------------------|--|----------------------------------------------------------|
| AQSD1                                        | RplC (MSMEG_1436)  | 50S ribosomal protein L3                                   | <b>Cys154 cons.</b>                  |  | (R)RPGSIGG <sub>C154</sub> (+484)ATPGR(V)                |
| AQSL5                                        | RpsM (MSMEG_1521)  | 30S ribosomal protein S13                                  | <b>Cys86 cons.</b>                   |  | (R)KIEIG <sub>C86</sub> (+484)YQGLR(H)                   |
| AOR7F7                                       | RpsR2 (MSMEG_6895) | 30S ribosomal protein S18 2                                | <b>Cys57 cons.</b>                   |  | (R)VTGNC <sub>57</sub> (+484)VQHOR(D)                    |
| AQQUW9                                       | GatC (MSMEG_2364)  | Aspartyl/glutamyl-tRNA(Asn/Gln) amidotransferase subunit C | Cys71 not cons.                      |  | (K)DVNVTRPDTVQPC <sub>71</sub> (+484)LTQDEALAAAPK(A)     |
| AQQT3                                        | PheT (MSMEG_3777)  | Phenylalanine-tRNA ligase beta subunit                     | <b>Cys89 cons.</b>                   |  | (K)YDVDSQNVGAPRDNV <sub>C89</sub> (+484)GAR(N)           |
| AQQQK5                                       | Lon1 (MSMEG_0839)  | ATP-dependent protease La (LON) domain subfamily protein   | Cys72 not cons.                      |  | (R)IDC <sub>72</sub> (+484)QNLGANR(Y)                    |
| AQQT6                                        | MSMEG_1918         | Sensor histidine kinase                                    | Cys421 not cons.                     |  | (K)TEQG <sub>C421</sub> (+484)VTIK(A)                    |
| AQQWX7                                       | OpcA (MSMEG_3100)  | OpcA protein                                               | Cys157 not cons.                     |  | (R)TDATNGTDPLAC <sub>157</sub> (+484)IK(S)               |
| AQQP8                                        | Def (MSMEG_0832)   | Peptide deformylase                                        | Cys68 not cons.                      |  | (R)LFVYDC <sub>68</sub> (+484)APTR(G)                    |
| DNA replication and transcription regulation |                    |                                                            |                                      |  |                                                          |
| AQRV8                                        | MSMEG_1255         | ATP-dependent DNA helicase, UvrD/REP family                | Cys361 not cons.                     |  | (R)JAGDGA <sub>AAA</sub> C <sub>361</sub> (+484)ER(V)    |
| AQOS66                                       | RpoC (MSMEG_1368)  | DNA-directed RNA polymerase subunit beta'                  | Cys1241 not cons.                    |  | (R)VLTDAINC <sub>1241</sub> (+484)R(S)                   |
| AOR0Z8                                       | Rnz2 (MSMEG_4568)  | Ribonuclease Z                                             | <b>Cys215 cons.</b>                  |  | (R)JRDC <sub>215</sub> (+484)DYHSSVQEAATAAR(A)           |
| AQQVZ3                                       | IdeR (MSMEG_2750)  | Iron-dependent repressor IdeR                              | <b>Cys102 cons.</b>                  |  | (R)LLVDVIGLPWEDVHAEAC <sub>102</sub> (+484)R(W)          |
| AOR217                                       | MSMEG_4953         | Putative transcriptional regulator                         | Cys21 not cons.                      |  | (R)LDAAET <sub>C21</sub> (+484)LR(A)                     |
| AQOP4                                        | TetR (MSMEG_0227)  | Transcriptional regulator, TetR family                     | Cys143 not cons.                     |  | (R)LTAILLGPPEPTAC <sub>143</sub> (+484)R(V)              |
| DNA replication and transcription regulation |                    |                                                            |                                      |  |                                                          |
| AOR3Y5                                       | EchA6 (MSMEG_5639) | Enoyl-CoA hydratase                                        | Cys26 not cons.                      |  | (R)NALNC <sub>26</sub> (+484)ELVDSL(R)                   |
| AQQP4                                        | MSMEG_0531         | Acyl-CoA dehydrogenase                                     | Cys285 not cons.                     |  | (R)AAEYALDYAC <sub>285</sub> (+484)QR(E)                 |
| AOR461                                       | MSMEG_5715         | Luciferase-like protein                                    | Cys83 not cons.                      |  | (K)LGQM <sub>C83</sub> (+484)TAMSVR(N)                   |
| AORS9                                        | MSMEG_6208         | Acyl-CoA thioesterase                                      | Cys21 not cons.                      |  | (R)DGDVFC <sub>21</sub> (+484)REPEPNTIER(L)              |
| AQQT7                                        | AccD5 (MSMEG_1813) | Propionyl-CoA carboxylase beta chain                       | Cys356 not cons.                     |  | (R)VEGRPVGVANQPQFAGC <sub>356</sub> (+484)LDINASEK(A)    |
| AOR0B6                                       | AccD6 (MSMEG_4329) | Acetyl/propionyl-CoA carboxylase (Beta subunit)            | Cys294 not cons.                     |  | (R)LGGC <sub>294</sub> (+484)LNSEAEK(S)                  |
| Enzymes involved in detoxification           |                    |                                                            |                                      |  |                                                          |
| AOR5M3                                       | Adh2 (MSMEG_6242)  | Alcohol dehydrogenase, iron-containing                     | <b>Cys398 cons.</b>                  |  | (R)AISEHIQDDWC <sub>398</sub> (+484)TPGNPR(E)            |
| AOR1V9                                       | AhpC (MSMEG_4891)  | Alkyl hydroperoxide reductase subunit C                    | <b>Cys61 cons. ; peroxidatic Cys</b> |  | (K)DFTFVC <sub>61</sub> (+484)PTEIAAFGK(L)               |
| AQQV23                                       | OsmC (MSMEG_2421)  | OsmC family protein                                        | <b>Cys116 cons.</b>                  |  | (R)AVDQVC <sub>116</sub> (+484)TVGR(T)                   |
| AQXZ5                                        | Tpx (MSMEG_3479)   | Probable thiol peroxidase                                  | <b>Cys60 cons. ; peroxidatic Cys</b> |  | (K)SVLLNFPSPVDPVPC <sub>60</sub> (+484)ATSVR(T)          |
| Proteins with other/unknown functions        |                    |                                                            |                                      |  |                                                          |
| AOR111                                       | RsfS (MSMEG_4580)  | Ribosomal silencing factor RsfS                            | Cys111 not cons.                     |  | (R)LLWKDC <sub>111</sub> (+484)PQVVPVLDHREASEDGAEEQ(-)   |
| AQOSK6                                       | RmlB (MSMEG_1512)  | dTDP-glucose 4,6-dehydratase                               | Cys242 not cons.                     |  | (R)TYLIGAE <sub>C242</sub> (+484)ER(N)                   |
| AQQV25                                       | Smc (MSMEG_2423)   | Chromosome partition protein Smc                           | Cys847 not cons.                     |  | (R)VA <sub>AAV</sub> SE <sub>C847</sub> (+484)GR(Q)      |
| AQQA3                                        | MSMEG_0683         | Uncharacterized protein                                    | Cys78 not cons.                      |  | (R)MYVHDGVVVAEQITTC <sub>78</sub> (+484)ADGSTAAGASAFR(V) |
| AQQQC2                                       | MSMEG_0703         | Uncharacterized protein                                    | Cys28 not cons.                      |  | (R)ATGPDAPTL <sub>C28</sub> (+484)EGWTTTR(D)             |
| AQQY84                                       | MSMEG_3569         | Uncharacterized protein                                    | Cys18 not cons.                      |  | (R)ADDAWC <sub>18</sub> (+484)AR(M)                      |
| AORZQ6                                       | MSMEG_5198         | Carnitiny-CoA dehydratase                                  | Cys202 not cons.                     |  | (R)ITC <sub>202</sub> (+484)NAPLAVQASK(R)                |
| AOR3A6                                       | PrpE (MSMEG_5404)  | AMP-dependent synthetase and ligase                        | <b>Cys165 cons.</b>                  |  | (K)VVVAAS <sub>C165</sub> (+484)GIGPTR(I)                |

**Table S1. Summary of the discovered targets for protein S-mycothiolations in Actinomycetes.** Selected S-mycothiolated proteins were identified under NaOCl stress in *Corynebacterium glutamicum*, *Corynebacterium diphtheriae* and *Mycobacterium smegmatis* according to previous studies [1,2,3]. The S-mycothiolated proteins were identified using shotgun liquid chromatography tandem mass spectrometry (LC-MS/MS) analysis based on a mass increase of 484 Da for MSH at Cys peptides. Conserved Cys residues were identified using the conserved domain database (CDD) ([www.ncbi.nlm.nih.gov/Structure/cdd/wrps.cgi](http://www.ncbi.nlm.nih.gov/Structure/cdd/wrps.cgi)) and indicated in bold-face. The table lists the UniprotKB accession numbers (<http://www.uniprot.org/>), protein name (DIP-ID, MSMEG-ID), function, the S-thiolated Cys peptide sequence, and information about conservation of Cys residues according to CDD.

#### References :

- Chi, B. K., T. Busche, K. Van Laer, K. Bäsell, D. Becher, L. Clermont, G. M. Seibold, M. Persicke, J. Kalinowski, J. Messens, and H. Antelmann. 2014. Protein S-mycothiolation functions as redox-switch and thiol protection mechanism in *Corynebacterium glutamicum* under hypochlorite stress. *Antioxid Redox Signal* 20 (4):589-605. doi: 10.1089/ars.2013.5423.
- Hillion, M., M. Imber, B. Pedre, J. Bernhardt, M. Saleh, V. V. Loi, S. Maass, D. Becher, L. Astoffi Rosado, L. Adrian, C. Weise, R. Hell, M. Wirtz, J. Messens, and H. Antelmann. 2017. The glyceraldehyde-3-phosphate dehydrogenase GapDH of *Corynebacterium diphtheriae* is redox-controlled by protein S-mycothiolation under oxidative stress. *Sci Rep* 7 (1):5020. doi: 10.1038/s41598-017-05206-2.
- Hillion, M., J. Bernhardt, T. Busche, M. Rossius, S. Maass, D. Becher, M. Rawat, M. Wirtz, R. Hell, C. Ruckert, J. Kalinowski, and H. Antelmann. 2017. Monitoring global protein thiol-oxidation and protein S-mycothiolation in *Mycobacterium smegmatis* under hypochlorite stress. *Sci Rep* 7 (1):1195. doi: 10.1038/s41598-017-01179-4.

**Table S2. Summary of the discovered targets for protein S-bacillithiolation in *Bacillus* and *Staphylococcus* species.**

| Accession                                            | Protein               | Function                                                                                        | Conservation/function of Cys-SSB                                         | Peptide-SSB Sequence                                                                       |
|------------------------------------------------------|-----------------------|-------------------------------------------------------------------------------------------------|--------------------------------------------------------------------------|--------------------------------------------------------------------------------------------|
| <b><i>Bacillus subtilis</i><sup>4</sup></b>          |                       |                                                                                                 |                                                                          |                                                                                            |
| <b>Metabolism of carbohydrates and amino acids</b>   |                       |                                                                                                 |                                                                          |                                                                                            |
| P80877                                               | MetE                  | Methionine synthase                                                                             | Cys647,730 cons. ; Zn-binding active site                                | (R)FWVNPDC <sub>344</sub> (+396)GLK(T)<br>(R)PSTEEYNIWDALAC <sub>344</sub> (+396)PTDR(F)   |
| P42318                                               | YyG                   | methionine synthase homolog                                                                     | Cys346 cons. ; Zn-binding active site                                    | (R)YVSLDQLC <sub>344</sub> (+HAM)SPQC <sub>344</sub> (+396)GFASTEENK(L)                    |
| P37487                                               | PpaC                  | manganese-dependent inorganic pyrophosphatase                                                   | Cys558 cons.                                                             | (K)SPTC <sub>344</sub> (+396)TDQDVA(A)K(E)                                                 |
| P35136                                               | SerA                  | D-3-phosphoglycerate dehydrogenase (serine biosynthesis)                                        | Cys410 cons. in <i>Bacillus</i> species                                  | (K)ISSSEGYDNC <sub>344</sub> (+396)ISVK(V)                                                 |
| P39912                                               | AroA                  | Phospho-2-dehydro-3-deoxyheptonate aldolase/ chorismate mutase                                  | Cys126 cons.                                                             | (R)FVGPCC <sub>344</sub> (+396)AVESYEQVAEVA(A)K(K)                                         |
| <b>Metabolism of coenzymes and nucleotides</b>       |                       |                                                                                                 |                                                                          |                                                                                            |
| P21879                                               | GuaB                  | Inosine-5'-monophosphate dehydrogenase                                                          | Cys308 cons. ; active site, Thioimidate intermediate                     | (K)VGGPGSC <sub>344</sub> (+396)TTR(V)                                                     |
| <b>Protein biosynthesis and quality control</b>      |                       |                                                                                                 |                                                                          |                                                                                            |
| P18255                                               | ThiS                  | Threonine-tRNA ligase 1                                                                         | Cys338 cons. ; Zn-binding, Cys573 not cons.                              | (R)IQCC <sub>344</sub> (+396)FGLR(V)                                                       |
| Q31678                                               | QueF                  | NADPH-dependent 7-oxo-7-deaza-guanine reductase                                                 | Cys56 cons. ; Zn-binding active site                                     | (K)FNC <sub>344</sub> (+HAM)PEFLS <sub>344</sub> (+396)PK(T)                               |
| P33166                                               | Tuf                   | Elongation factor Tu                                                                            | Cys83 cons. in GTP binding site (82-86)                                  | (R)HYAHVDC <sub>344</sub> (+396)PGHADYVK(N)                                                |
| <b>Enzymes involved in detoxification</b>            |                       |                                                                                                 |                                                                          |                                                                                            |
| P54170                                               | YphP                  | UPF0403 protein, bacilliredoxin (reduction of protein-SSB)                                      | Cys53 cons. ; active site                                                | (K)AEGTLLVWVSC <sub>344</sub> (+396)GC <sub>344</sub> (+HAM)AAGLAR(P)                      |
| Q34777                                               | OhrR                  | organic hydroperoxide resistance repressor                                                      | Cys15 cons. ; redox sensing                                              | (K)LENLCLC <sub>344</sub> (+396)FLYASSR(E)                                                 |
| <b><i>Bacillus amyloliquefaciens</i><sup>4</sup></b> |                       |                                                                                                 |                                                                          |                                                                                            |
| <b>Metabolism of carbohydrates and amino acids</b>   |                       |                                                                                                 |                                                                          |                                                                                            |
| A723J1                                               | MetE (RBAM_013040)    | Methionine synthase                                                                             | Cys730 cons. ; Zn-binding active site                                    | (R)FWVNPDC <sub>344</sub> (+396)GLK(T)<br>(R)VPATEEYQIDDALEVC <sub>344</sub> (+396)PTDR(F) |
| A72657                                               | SerA (RBAM_021220)    | D-3-phosphoglycerate dehydrogenase (serine biosynthesis)                                        | Cys410 cons.                                                             | (K)ISSSEGYDNC <sub>344</sub> (+396)ISVK(V)                                                 |
| A72789                                               | AroA (RBAM_026870)    | Phospho-2-dehydro-3-deoxyheptonate aldolase/ chorismate mutase                                  | Cys126 cons.                                                             | (R)FVGPCC <sub>344</sub> (+396)AVESYEQVAEVA(A)K(K)                                         |
| A72612                                               | AroE (RBAM_020760)    | 3-phosphoshikimate 1-carboxyvinyltransferase                                                    | Cys79 not cons.                                                          | (K)IGDALCC <sub>344</sub> (+396)EPSDLDVGNSTTR(L)                                           |
| <b>Metabolism of coenzymes and nucleotides</b>       |                       |                                                                                                 |                                                                          |                                                                                            |
| A720D1                                               | GuaB (RBAM_000120)    | Inosine-5'-monophosphate dehydrogenase                                                          | Cys308 cons. ; active site, Thioimidate intermediate                     | (K)VGGPGSC <sub>344</sub> (+396)TTR(V)                                                     |
| A727N3                                               | ThiI (RBAM_026510)    | Probable tRNA sulfuryltransferase (YtbI homolog) (Thiamine biosynthesis)                        | Cys81 not cons.                                                          | (K)C <sub>344</sub> (+396)ISKLEID(K)                                                       |
| <b>Enzymes involved in Fe-S cluster assembly</b>     |                       |                                                                                                 |                                                                          |                                                                                            |
| F4E4C4                                               | SufA (BAMTA208_16285) | Chaperone involved in Fe-S cluster assembly                                                     | Cys102,104,120 cons. ; Fe-S-cluster                                      | (K)INAGTTEC <sub>344</sub> (+396)I(-)                                                      |
| <b>Enzymes involved in Cell wall biosynthesis</b>    |                       |                                                                                                 |                                                                          |                                                                                            |
| A721M1                                               | Air (RBAM_004580)     | Alanine racemase 1                                                                              | Cys63 not cons.                                                          | (K)AALGAGS <sub>344</sub> (+396)LAVALDEAIR(K)                                              |
| <b>Enzymes involved in detoxification</b>            |                       |                                                                                                 |                                                                          |                                                                                            |
| A728C1                                               | YumC (RBAM_029160)    | Ferredoxin-NADP reductase 2 B                                                                   | Cys85 cons. ; probably active site                                       | (K)FDOTC <sub>344</sub> (+396)LEQAVESVEK(Q)                                                |
| <b><i>Bacillus pumilus</i><sup>4</sup></b>           |                       |                                                                                                 |                                                                          |                                                                                            |
| <b>Metabolism of carbohydrates and amino acids</b>   |                       |                                                                                                 |                                                                          |                                                                                            |
| B4AEV7                                               | MetE (BAT_2841)       | Methionine synthase                                                                             | Cys730 Zn-binding active site                                            | (R)FWVNPDC <sub>344</sub> (+396)GLK(T)                                                     |
| AB8T1                                                | Ywaa (BPUM_3500)      | Branched-chain-amino-acid aminotransferase                                                      | Cys104 5-cysteinylated by diamide in <i>B. subtilis</i>                  | (R)LC <sub>344</sub> (+396)IPQIDTETVLEGLNELR(I)                                            |
| ABFG2                                                | AroA (BPUM_2621)      | Phospho-2-dehydro-3-deoxyheptonate aldolase/ chorismate mutase                                  | Cys126 cons.                                                             | (R)FVGPCC <sub>344</sub> (+396)AVESYEQVAEVA(A)K(K)                                         |
| BAAF61                                               | MetI (BAT_2947)       | Cystathionine gamma-synthase (CGS)                                                              | Cys35 cons.                                                              | (R)IANGVC <sub>344</sub> (+396)NWK(L)                                                      |
| BAIAN1                                               | LucC (BAT_1217)       | S-ribosylhomocysteine lyase (homocysteine biosynthesis)                                         | Cys84, 126 cons. ; Cys84 catalytic; Cys126 Fe-binding site               | (R)FC <sub>344</sub> (+396)PNPK(Q)                                                         |
| ABFG49                                               | ClzZ (BPUM_2556)      | Cltrate (Si)-synthase II (TCA cycle)                                                            | Cys195 cons.                                                             | (R)VC <sub>344</sub> (+396)WATLSYDQVTAAGALK(I)                                             |
| <b>Metabolism of coenzymes and nucleotides</b>       |                       |                                                                                                 |                                                                          |                                                                                            |
| B4AF80                                               | ThiG (BAT_2967)       | Thiazole synthase (Thiamine biosynthesis)                                                       | Cys 92 cons.                                                             | (K)VEIGC <sub>344</sub> (+396)SR(S)                                                        |
| <b>Protein biosynthesis and quality control</b>      |                       |                                                                                                 |                                                                          |                                                                                            |
| B4AN33                                               | Tuf (BAT_4036)        | Elongation factor Tu                                                                            | Cys83 cons. in GTP binding site (82-86)                                  | (R)HYAHVDC <sub>344</sub> (+396)PGHADYVK(N)                                                |
| <b>Enzymes involved in detoxification</b>            |                       |                                                                                                 |                                                                          |                                                                                            |
| B4AFT4                                               | KatX2 (BAT_3178)      | Catalase                                                                                        | no Cys cons.                                                             | (K)LLAC <sub>344</sub> (+396)NFR(Y)                                                        |
| ABFCN5                                               | YkuU (BPUM_1319)      | 2-Cys Peroxiredoxin YkuU                                                                        | Cys52, 169 cons. ; CS2 active site; Cys52-Cys169 catalytic disulfide     | (R)VGLAQTTGGC <sub>344</sub> (+396)PANVKNPKGQK(T)                                          |
| <b>Proteins with other/unknown functions</b>         |                       |                                                                                                 |                                                                          |                                                                                            |
| ABFHX4                                               | FlwW (BPUM_3187)      | Flagellar assembly factor FlwW                                                                  | Cys144 not cons.                                                         | (K)HLEVAASC <sub>344</sub> (+396)                                                          |
| <b><i>Bacillus megaterium</i><sup>4</sup></b>        |                       |                                                                                                 |                                                                          |                                                                                            |
| <b>Metabolism of carbohydrates and amino acids</b>   |                       |                                                                                                 |                                                                          |                                                                                            |
| DSDIR6                                               | MetE (BMD_3527)       | Methionine synthase                                                                             | Cys732 cons. ; Zn-binding active site                                    | (R)ALQVLDPALFWINPDC <sub>344</sub> (+396)GLK(T)                                            |
| DSDER3                                               | PpaC (BMD_2499)       | manganese-dependent inorganic pyrophosphatase                                                   | Cys158 cons. ; Thioimidate intermediate                                  | (K)SPTC <sub>344</sub> (+396)TDQDVA(A)K(E)                                                 |
| <b>Metabolism of coenzymes and nucleotides</b>       |                       |                                                                                                 |                                                                          |                                                                                            |
| DSO924                                               | GuaB (BMD_0013)       | Inosine-5'-monophosphate dehydrogenase                                                          | Cys308 cons. ; active site, Thioimidate intermediate                     | (K)VGGPGSC <sub>344</sub> (+396)TTR(V)                                                     |
| <b><i>Staphylococcus carnosus</i><sup>4</sup></b>    |                       |                                                                                                 |                                                                          |                                                                                            |
| <b>Metabolism of carbohydrates and amino acids</b>   |                       |                                                                                                 |                                                                          |                                                                                            |
| B9DN54                                               | AroA (Sca_1344)       | Phospho-2-dehydro-3-deoxyheptonate aldolase/ chorismate mutase                                  | Cys83, 125 cons. ; Cys83 essential for catalysis; Cys125 Fe-binding site | (K)SFFGPC <sub>344</sub> (+396)YVESQEQVX(V)                                                |
| B9DN51                                               | Ldh (Sca_1369)        | L-lactate dehydrogenase                                                                         | Cys72 cons.                                                              | (K)AGSYEDC <sub>344</sub> (+396)SDNLVITAGAPQKGETR(L)                                       |
| <b>Metabolism of coenzymes and nucleotides</b>       |                       |                                                                                                 |                                                                          |                                                                                            |
| B9DM03                                               | GuaB (Sca_0049)       | Inosine-5'-monophosphate dehydrogenase                                                          | Cys307 cons. ; active site                                               | (K)VGGPGSC <sub>344</sub> (+396)TTR(I)                                                     |
| Q9RG56                                               | ThiM (Sca_1594)       | Hydroxyethylthiazole kinase (Thiamine biosynthesis)                                             | Cys258 not cons.                                                         | (R)IDSDVAENCC <sub>344</sub> (+396)NLEEV(K-)                                               |
| B9DN59                                               | YtpR (Sca_1349)       | similar to Phe-tRNA synthetase (YtpR homolog)                                                   | Cys116,126,170 cons.                                                     | (K)VVNGNELIOLVC <sub>344</sub> (+396)GAPNVAGAGQ(V)                                         |
| B9DM56                                               | Adk (Sca_1714)        | Adenylate kinase                                                                                | Cys 130, 133, 150 cons. ; Zn finger motif                                | (K)VDVC <sub>344</sub> (+396)DLGGK(L)                                                      |
| <b>Protein biosynthesis and quality control</b>      |                       |                                                                                                 |                                                                          |                                                                                            |
| B9DNV8                                               | Tuf (Sca_0207)        | Elongation factor Tu                                                                            | Cys82 cons. in GTP binding site (81-85)                                  | (R)HYAHVDC <sub>344</sub> (+396)PGHADYVK(N)                                                |
| B9DN0X                                               | DnaK (Sca_1202)       | Chaperone protein DnaK                                                                          | no Cys cons.                                                             | (K)IGIDLTNSC <sub>344</sub> (+396)IVALEDFPK(V)                                             |
| B9DNK1                                               | GrpE (Sca_1203)       | Chaperone protein GrpE                                                                          | no Cys cons.                                                             | (K)TYGAQC <sub>344</sub> (+396)VLDTLPIDNIE(A)                                              |
| <b>Enzymes involved in detoxification</b>            |                       |                                                                                                 |                                                                          |                                                                                            |
| B9DNV0                                               | YphP (Sca_1072)       | UPF0403 protein, bacilliredoxin (reduction of protein-SSB)                                      | Cys54 cons. ; active site (CxC-motif)                                    | (K)NVKDETFVINSTC <sub>344</sub> (+396)GC <sub>344</sub> (+HAM)AAGLAR(P)                    |
| B9DNJ8                                               | YtxI (Sca_0389)       | DUF2847 protein, bacilliredoxin (reduction of protein-SSB)                                      | Cys30 cons. ; active site (TCP-motif)                                    | (K)HSNTC <sub>344</sub> (+396)PISANAYDQFNK(F)                                              |
| <b>Proteins with other/unknown functions</b>         |                       |                                                                                                 |                                                                          |                                                                                            |
| B9DLW2                                               | ScbB (Sca_1370)       | ScbB precursor                                                                                  | Cys166 cons.                                                             | (R)TSSGANNYTAGQC <sub>344</sub> (+396)TYFAFD(R)                                            |
| B9DQ05                                               | TypA (Sca_0735)       | Putative GTP-binding protein family protein TypA (YtaG homolog)                                 | Cys408 not cons.                                                         | (R)VQC <sub>344</sub> (+396)EVQENAVIESLQQR(K)                                              |
| B9DN38                                               | Sca_1381              | Putative transaldolase                                                                          | Cys200 cons.                                                             | (R)ELLVQADEIGADITC <sub>344</sub> (+396)PSGVSK(I)                                          |
| B9DM0L                                               | Sca_1554              | Putative ABC transporter ATP-binding protein                                                    | no Cys cons.                                                             | (R)QIENC <sub>344</sub> (+HAM)EAEIAC <sub>344</sub> (+396)EQK(I)                           |
| B9DM05                                               | Sca_1625              | Putative aldehyde dehydrogenase family protein (similar to GbsA betaine aldehyde dehydrogenase) | Cys279 cons. ; active site                                               | (K)VVNTGQVC <sub>344</sub> (+396)TAGTR(T)                                                  |
| <b><i>Staphylococcus aureus</i><sup>5</sup></b>      |                       |                                                                                                 |                                                                          |                                                                                            |
| <b>Metabolism of carbohydrates and amino acids</b>   |                       |                                                                                                 |                                                                          |                                                                                            |
| AR21A0_STAAT                                         | Gap                   | Glyceraldehyde-3-phosphate dehydrogenase                                                        | Cys151 cons. ; active site (catalytic Cys)                               | (K)TVVNTNHOEIDGSETVVSAGS <sub>344</sub> (+396)ITNSLAPVA(V)                                 |
| PPAC_STAAT                                           | PpaC                  | Mn-dependent inorganic pyrophosphatase                                                          | Cys110 cons.                                                             | (R)IANETAGPC <sub>344</sub> (+396)YR(R)                                                    |
| <b>Metabolism of coenzymes and nucleotides</b>       |                       |                                                                                                 |                                                                          |                                                                                            |
| ABZ0R0_STAAT                                         | GuaB                  | Inosine-5'-monophosphate dehydrogenase                                                          | Cys307 cons. ; active site, Thioimidate intermediate                     | (K)VGGPGSC <sub>344</sub> (+396)TTR(V)                                                     |
| <b>Protein biosynthesis and quality control</b>      |                       |                                                                                                 |                                                                          |                                                                                            |
| RL36_STAAT                                           | RpmJ                  | 50S ribosomal protein L36                                                                       | Cys 11 cons.                                                             | (K)VPSVNPCC <sub>344</sub> (+396)EK(C)                                                     |
| <b>Proteins with other/unknown functions</b>         |                       |                                                                                                 |                                                                          |                                                                                            |
| AY8Y7_STAAT                                          | AldA                  | Aldehyde dehydrogenase                                                                          | Cys 279 cons. ; active site (catalytic Cys)                              | (K)VVNTGQVC <sub>344</sub> (+396)TAGTR(V)                                                  |

**Table S2. Summary of the identified proteins with S-bacillithiolated peptides in *Bacillus subtilis*, *Bacillus amyloliquefaciens*, *Bacillus pumilus*, *Bacillus megaterium*, *Staphylococcus carnosus* and *Staphylococcus aureus*.** Selected S-bacillithiolated proteins were identified in different *Bacillus* and *Staphylococcus* species under NaOCl stress according to previous studies (4,5). The S-bacillithiolated proteins were identified using shotgun liquid chromatography tandem mass spectrometry (LC-MS/MS) based on a mass increase of 396 Da for BSH at Cys peptides. Conserved Cys residues were identified using the conserved domain database (CDD) ([www.ncbi.nlm.nih.gov/Structure/cdd/wrpsb.cgi](http://www.ncbi.nlm.nih.gov/Structure/cdd/wrpsb.cgi)) and indicated in bold-face. The table lists the UniProtKB accession numbers (<http://www.uniprot.org/>), protein name and locus tag, function, the S-thiolated Cys peptide sequence, and information about conservation of Cys residues according to CDD.

**References :**

(4) Chi, B. K., A. A. Roberts, T. T. Huyen, K. Büssel, D. Becher, D. Albrecht, C. J. Hamilton, and H. Antelmann. 2013. S-bacillithiolation protects conserved and essential proteins against hypochlorite stress in *Firmicutes* bacteria. *Antioxid Redox Signal* 18 (11):1273-95. doi: 10.1089/ars.2012.4686.

(5) Imber, M., N. T. T. Huyen, A. J. Pietrzyk-Brzezinska, V. V. Loi, M. Hillion, J. Bernhardt, L. Thärchen, K. Kolsek, M. Saleh, C. J. Hamilton, L. Adrián, F. Gräter, M. C. Wahl, and H. Antelmann. 2018. Protein S-bacillithiolation functions in thiol protection and redox regulation of the glyceraldehyde-3-phosphate dehydrogenase Gap in *Staphylococcus aureus* under hypochlorite stress. *Antioxid Redox Signal* 28 (6):410-430. doi: 10.1089/ars.2016.6897.
